# Supplementary material
Source: HighWire-hosted journal article supplement (https://bmjopen.bmj.com/content/15/5/e092714)
Supplement: inline-supplementary-material-2 [file inline-supplementary-material-2.pdf]

**Table S2.** Logistic regression models of the link between GA and 10-year ASCVD risk

|    | Model 1 |                |         | Model 2 |                |       | Model 3 |                |       |
|----|---------|----------------|---------|---------|----------------|-------|---------|----------------|-------|
|    | OR      | 95%CI          | p       | OR      | 95%CI          | p     | OR      | 95%CI          | p     |
| GA | 1.138   | (1.094, 1.185) | < 0.001 | 1.142   | (1.049, 1.240) | 0.002 | 1.160   | (1.055, 1.276) | 0.002 |

**Notes:** Model 1 = GA; Model 2 = Model 1 + Age + Sex + Smoking status + Sport status + BMI + WC + SBP +DBP; Model 3 = Model 2 + Albumin + Platelet + Total Cholesterol + Triglyceride + HDL-C + Cervical vascular plaques + MAFLD.
